# Supplementary material for: The Rsr1/Bud1 GTPase Interacts with Itself and the Cdc42 GTPase during Bud-Site Selection and Polarity Establishment in Budding Yeast
Source: PubMed Central journal article supplement — Mol Biol Cell. 2010 Sep 1;21(17):3007–16. doi: 10.1091/mbc.E10-03-0232 (PMC2929994; doi:10.1091/mbc.e10-03-0232), 2010-09-01
Supplement: E10-03-0232_1.pdf [file E10-03-0232_1.pdf]

## Supplemental Methods

### Cloning of plasmids

Standard methods of recombinant DNA manipulation were used. See Supplemental table I for a list of plasmids used in this study.

### Plasmids for Bimolecular fluorescence complementation assays

For expression of Rsr1 and its mutant proteins fused to YFP<sup>N</sup>, the *NotI* fragment (carrying the GFP portion) of pRS304-GFP-RSR1 (pHP808), pRS304-GFP-rsr1<sup>K260-264S</sup> (pHP1065), pRS304-GFP-RSR1<sup>G12V</sup> (pHP841) and pRS304-GFP-RSR1<sup>K16N</sup> (pHP842) (Park *et al.*, 2002) was replaced with the *NotI* fragment carrying the YFP<sup>N</sup> fragment from pRS304-TRR1-YFP<sup>N</sup> (pHP1514) (Singh *et al.*, 2008), resulting in pRS304-YFP<sup>N</sup>-RSR1 (pHP1598), pRS304-YFP<sup>N</sup>-rsr1<sup>K260-264S</sup> (pHP1614), pRS304-YFP<sup>N</sup>-RSR1<sup>G12V</sup> (pHP1619) and pRS304-YFP<sup>N</sup>-RSR1<sup>K16N</sup> (pHP1679), respectively. Similarly, the GFP portion was replaced with the DNA fragment encoding YFP<sup>C</sup> from pRS306-RHO5-YFP<sup>C</sup> (pHP1501) (Singh *et al.*, 2008), resulting in pRS304-YFP<sup>C</sup>-RSR1 (pHP1612), pRS304-YFP<sup>C</sup>-rsr1<sup>K260-264S</sup> (pHP1613), pRS304-YFP<sup>C</sup>-RSR1<sup>G12V</sup> (pHP1674) and pRS304-YFP<sup>C</sup>-RSR1<sup>K16N</sup> (pHP1678). To express YFP<sup>C</sup>-Rsr1 from a CEN plasmid, the *NotI* fragment (carrying the GFP portion) of YCp50-GFP-RSR1 (pHP761) was replaced with the *NotI* fragment carrying the YFP<sup>C</sup> fragment from pRS306-RHO5-YFP<sup>C</sup>, resulting in YCp-YFP<sup>C</sup>-RSR1 (pHP1599). Both YFP<sup>N</sup> and YFP<sup>C</sup> were fused to the N terminus of Rsr1 and its mutants to avoid any possible interference with their C-terminal modification. A control plasmid pHP1730 (YCp50-YFP<sup>C</sup>) was generated from YCp50-YFP<sup>C</sup>-RSR1 (pHP1599) by deleting the 1.1 kb-SnaBI fragment, resulting in expression of YFP<sup>C</sup> fused to the first 30 residues of Rsr1 from the *RSR1* promoter.

### The polybasic region (PBR) mutants of *RSR1*

Mutations in the polybasic region (PBR) of *RSR1* were introduced by PCR-based site-directed mutagenesis. The plasmid pRS304-GFP-rsr1-8<sup>K260-261S</sup> (pHP1040) was generated by PCR using the plasmid pRS304-GFP-RSR1 (pHP808) as a template and a primer pair of oBUD132 (5'-GAATTAGCGCTACTTCACAACAGAGCTCAAAGAAGAAAAACGCTTCCAC-3') and oBUD133 (5'-GTGGAAGCGTTTTTCTTCTTTGAGCTCTGTTGTGAAGTAGCGCTAATTC-3'). Similarly, pRS304-GFP-rsr1-9<sup>K263-264S</sup> (pHP1041) was generated using a primer pair of oBUD134 (5'-CTTACAACAAAAGAAAAAGAGCTCAAACGCTTCCACTTGCCTACTATTC-3') and oBUD135 (5'-GAATAGTGCAAGTGGAAGCGTTTGTGAGCTCTTTTCTTTTGTGTTGAAG-3').

The integrating plasmid pRS304-rsr1-7<sup>K260-264S</sup> (pHP1373) was generated from pRS304-GFP-rsr1-7<sup>K260-264S</sup> (pHP1065) (Park *et al.*, 2002) by deleting the *NotI* fragment carrying the GFP moiety. Other integrating plasmids pRS304-rsr1-8<sup>K260-261S</sup> (pHP1747) and pRS304-rsr1-9<sup>K263-264S</sup> (pHP1748) were generated similarly from pHP1040 and pHP1041. To generate an integrating plasmid carrying *rsr1-7<sup>K260-264S</sup>* with the *LEU2* marker, the 1.58 kb *Sall-SacI* fragment (carrying *rsr1<sup>K260-264S</sup>*) from pHP1373 was inserted into pRS305, resulting in pRS305-rsr1-7<sup>K260-264S</sup> (pHP1634).

To construct multicopy plasmids carrying the *rsr1-8<sup>K260-261S</sup>* and *rsr1-9<sup>K263-264S</sup>* alleles and the *URA3* marker, the 1.09 kb *Bsu36I-Sall* fragment of YEplac195-RSR1 (pHP1118) (Kozminski *et al.*, 2003) was replaced with the *Bsu36I-Sall* fragment from pHP1040 and pHP1041, resulting in pHP1755 and pHP1753, respectively.

To construct multicopy plasmids carrying the *rsr1*<sup>G12V, K260-264S</sup> and *rsr1*<sup>K16N, K260-264S</sup> alleles with URA3 marker, the 1.09 kb *Bsu36I-SalI* fragments of YEplac195 *rsr1*<sup>G12V</sup> (pHP1125) and YEplac195 *rsr1*<sup>K16N</sup> (pHP1126) (Kozminski *et al.*, 2003) were replaced with the *Bsu36I-SalI* fragment from pHP1065, resulting in pHP1771 and pHP1772, respectively.

### **Plasmids for Rsr1 protein purification**

GST-Rsr1 was expressed in *E. coli* using the plasmid pRS4 (pHP593) (Holden *et al.*, 1991). To express GST-rsr1-7<sup>K260-264S</sup> in yeast, the 1.09 kb *Bsu36I-SalI* fragment of pRD56-RSR1 (pHP594) (Park *et al.*, 1993) was replaced with *Bsu36I-SalI* fragment from pHP1065, resulting in pRD56-rsr1-7<sup>K260-264S</sup> (pHP1630). To express GST-rsr1-7<sup>K260-264S</sup> in *E. coli*, the 1.4 kb *BamHI-SalI* fragment from pHP1630 was then cloned into pGEX2\*vector, resulting in pGEX2\*-rsr1-7<sup>K260-264S</sup> (pHP1651).

## References For Supplemental Information

- Bailly, E., Cabantous, S., Sondaz, D., Bernadac, A., and Simon, M.-N. (2003). Differential cellular localization among mitotic cyclins from *Saccharomyces cerevisiae*: a new role for the axial budding protein Bud3 in targeting Clb2 to the mother-bud neck. *J. Cell Science* *116*, 4119-4130.
- Chant, J., Corrado, K., Pringle, J.R., and Herskowitz, I. (1991). Yeast *BUD5*, encoding a putative GDP-GTP exchange factor, is necessary for bud site selection and interacts with bud formation gene *BEM1*. *Cell* *65*, 1213-1224.
- Gietz, R.D., and Sugino, A. (1988). New yeast-*Escherichia coli* shuttle vectors constructed with in vitro mutagenized yeast genes lacking six-base pair restriction sites. *Gene* *74*, 527-534.
- Holden, J.L., Nur-E-Kamal, M.S.A., Fabri, L., Nice, E., Hammacher, A., and Maruta, H. (1991). Rsr1 and Rap1 GTPases are activated by the same GTPase-activating protein and require threonine 65 for their activation. *J Biol Chem* *266*, 16992-16995.
- Kozminski, K.G., Beven, L., Angerman, E., Tong, A.H.Y., Boone, C., and Park, H.-O. (2003). Interaction between a Ras and a Rho GTPase couples selection of a growth site to the development of cell polarity in yeast. *Mol. Biol. Cell* *14*, 4958-4970.
- Park, H.-O., Chant, J., and Herskowitz, I. (1993). *BUD2* encodes a GTPase-activating protein for Bud1/Rsr1 necessary for proper bud-site selection in yeast. *Nature* *365*, 269-274.
- Park, H.-O., Kang, P.J., and Rachfal, A.W. (2002). Localization of the Rsr1/Bud1 GTPase involved in selection of a proper growth site in yeast. *J. Biol. Chem.* *277*, 26721-26724.
- Sikorski, R.S., and Hieter, P. (1989). A system of shuttle vectors and yeast host strains designed for efficient manipulation of DNA in *Saccharomyces cerevisiae*. *Genetics* *122*, 19-27.
- Singh, K., Kang, P.J., and Park, H.-O. (2008). The Rho5 GTPase is necessary for oxidant-induced cell death in budding yeast. *Proc. Natl. Acad. Sci. USA.* *105*, 1522-1527.

**Supplemental Table I. Plasmids used in this study**

| Plasmid   | Description                                          | Source/Comments <sup>@</sup>         |
|-----------|------------------------------------------------------|--------------------------------------|
| pRS304    | <i>TRP1</i> (integrative)                            | (Sikorski and Hieter, 1989)          |
| pRS305    | <i>LEU2</i> (integrative)                            | (Sikorski and Hieter, 1989)          |
| YEplac195 | <i>URA3</i> (high copy)                              | (Gietz and Sugino, 1988)             |
| pHP501    | pUC18-bud5Δ::URA3                                    | (Chant <i>et al.</i> , 1991)         |
| pHP529    | pUC19-bud2Δ::LEU2                                    | (Park <i>et al.</i> , 1993)          |
| pHP582    | pRS425-RSR1-HA                                       | (Park <i>et al.</i> , 1993)          |
| pHP808    | pRS304-GFP-RSR1                                      | (Park <i>et al.</i> , 2002)          |
| pHP841    | pRS304-GFP-RSR1 <sup>G12V</sup>                      | (Park <i>et al.</i> , 2002)          |
| pHP842    | pRS304-GFP-RSR1 <sup>K16N</sup>                      | (Park <i>et al.</i> , 2002)          |
| pHP1065   | pRS304-GFP-rsr1-7 <sup>K260-264S</sup>               | (Park <i>et al.</i> , 2002)          |
| pHP1501   | pRS306-RHO5-YFP <sup>C</sup>                         | (Singh <i>et al.</i> , 2008)         |
| pHP1514   | pRS304-TRR1-YFP <sup>N</sup>                         | (Singh <i>et al.</i> , 2008)         |
| pHP1598   | pRS304-YFP <sup>N</sup> -RSR1                        | Derived from pHP808; This study      |
| pHP1612   | pRS304-YFP <sup>C</sup> -RSR1                        | Derived from pHP808; This study      |
| pHP1614   | pRS304-YFP <sup>N</sup> -rsr1-7 <sup>K260-264S</sup> | Derived from pHP1065; This study     |
| pHP1613   | pRS304-YFP <sup>C</sup> -rsr1-7 <sup>K260-264S</sup> | Derived from pHP1065; This study     |
| pHP1619   | pRS304-YFP <sup>N</sup> -RSR1 <sup>G12V</sup>        | Derived from pHP841; This study      |
| pHP1674   | pRS304-YFP <sup>C</sup> -RSR1 <sup>G12V</sup>        | Derived from pHP841; This study      |
| pHP1679   | pRS304-YFP <sup>N</sup> -RSR1 <sup>K16N</sup>        | Derived from pHP842; This study      |
| pHP1678   | pRS304-YFP <sup>C</sup> -RSR1 <sup>K16N</sup>        | Derived from pHP842; This study      |
| pHP761    | YCp50-GFP-RSR1                                       | (Park <i>et al.</i> , 2002)          |
| pHP1599   | YCp50-YFP <sup>C</sup> -RSR1                         | Derived from pHP761; This study      |
| pHP1730   | YCp50-YFP <sup>C</sup> -rsr1Δ                        | Derived from pHP1599; This study     |
| pHP1373   | pRS304-rsr1-7 <sup>K260-264S</sup>                   | Deleted GFP from pHP1065; This study |
| pHP1634   | pRS305-rsr1-7 <sup>K260-264S</sup>                   | This study                           |
| pHP1040   | pRS304-GFP-rsr1-8 <sup>K260-261S</sup>               | This study                           |
| pHP1041   | pRS304-GFP-rsr1-9 <sup>K263-264S</sup>               | (Park <i>et al.</i> , 2002)          |
| pHP1747   | pRS304-rsr1-8 <sup>K260-261S</sup>                   | This study                           |
| pHP1748   | pRS304-rsr1-9 <sup>K263-264S</sup>                   | This study                           |
| pHP1118   | YEplac195-RSR1                                       | (Kozminski <i>et al.</i> , 2003)     |
| pHP1123   | YEplac195-rsr1-7 <sup>K260-264S</sup>                | (Kozminski <i>et al.</i> , 2003)     |
| pHP1125   | YEplac195-RSR1 <sup>G12V</sup>                       | (Kozminski <i>et al.</i> , 2003)     |
| pHP1126   | YEplac195-RSR1 <sup>K16N</sup>                       | (Kozminski <i>et al.</i> , 2003)     |
| pHP1755   | YEplac195-rsr1-8 <sup>K260-261S</sup>                | This study                           |

|         |                                            |                                                         |
|---------|--------------------------------------------|---------------------------------------------------------|
| pHP1753 | YEplac195- rsr1-9 <sup>K263-264S</sup>     | This study                                              |
| pHP1771 | YEplac195- RSR1 <sup>G12V, K260-264S</sup> | This study                                              |
| pHP1772 | YEplac195- RSR1 <sup>K16N, K260-264S</sup> | This study                                              |
| pHP635  | pGEX2*                                     | A <i>E. coli</i> GST fusion plasmid (Amp <sup>R</sup> ) |
| pHP593  | pRS4-RSR1                                  | (Holden <i>et al.</i> , 1991)                           |
| pHP594  | pRD56-RSR1                                 | GALp-GST-RSR1, CEN, URA3 (Park <i>et al.</i> , 1993)    |
| pHP1630 | pRD56-rsr1-7                               | This study                                              |
| pHP1651 | pGEX2*-rsr1-7 <sup>K260-264S</sup>         | This study                                              |
| pHP1593 | pKTUB1-CFP [URA3]                          | From Marie-Noelle Simon (Bailly <i>et al.</i> , 2003)   |

---

<sup>@</sup> For details of cloning procedure, see Supplemental Methods.

## Figure Legends

Suppl. Fig. S1. Analyses of the pixel intensity of YFP-Rsr1 in the cells marked in Figure 3. Localization of YFP-Rsr1 to the mother-bud neck was analyzed in wild type (HPY1632), *bud5Δ* (HPY1668) and *bud2Δ* (HPY1664). Pixel intensities along the indicated lines of the 2D images (maximum projection) are shown (in arbitrary unit) after subtracting the background. A cell (a) undergoes nuclear division, whereas cells (b - d) have completed nuclear division (see Figure 3). A blue arrow and arrowheads mark the position of the mother-bud neck; and grey arrows mark the position of the plasma membrane. About 2~2.5 fold higher fluorescence intensity was observed at the mother-bud (compared to the overall plasma membrane) in wild-type and *bud2Δ* cells after anaphase.

Suppl. Fig. S2. The steady-state levels of GFP-Rsr1 and GFP fusions of the Rsr1 mutant proteins at 25°C, 30°C and 37°C.

Strains expressing GFP-Rsr1 (HPY401), GFP-Rsr1-7 (HPY621), GFP-Rsr1-8 (HPY588), and GFP-Rsr1-9 (HPY589) were grown at the indicated temperatures. Each GFP fusion was expressed from the *RSR1* locus on the chromosome. Approximately equal amounts of the total protein were loaded on each lane. The GFP fusion proteins were detected with polyclonal antibodies against GFP (top panel). An asterisk marks a non-specific cross-reacting band (lower panel) that was used as a loading control. The level of GFP-Rsr1-9 was higher than wild type and other Rsr1 mutant proteins at all temperatures tested. This is likely to be caused by the multiple insertion events of the plasmid on the chromosome.

Suppl. Fig. S3. The fluorescence intensity of YFP-Rsr1 and YFP-Rsr1<sup>K16N</sup> are about the same at 25°C and 30°C.

A. A single Z section of cells (HPY402), which express YFP-Rsr1 from the *RSR1* locus, is shown after deconvolution. Cells were grown at 25°C (a) and 30°C (b). Pixel intensity along the line is shown below after subtracting the background. Bar, 5 μm.

B. A single Z section of cells (HPY423) expressing YFP-Rsr1<sup>K16N</sup> from the *RSR1* locus is shown as in A. Bar, 5 μm.

*WT*

*bud5* $\Delta$

*bud2* $\Delta$

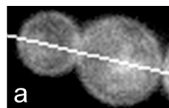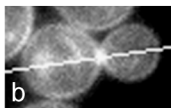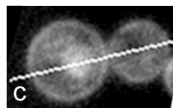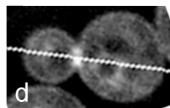

Fluorescence (au)

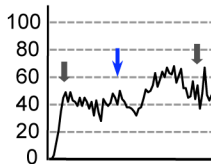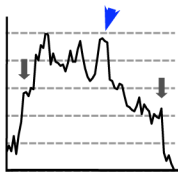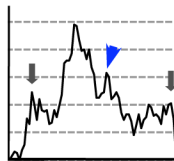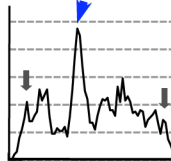

Supplemental Fig S1

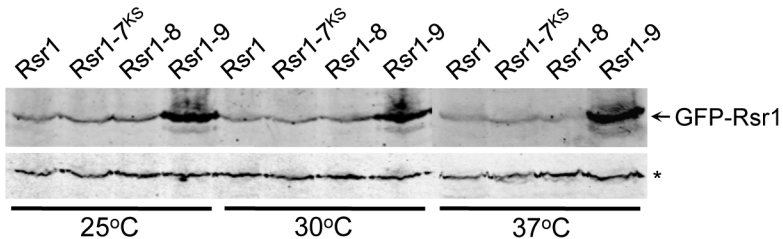

Supplemental Fig S2



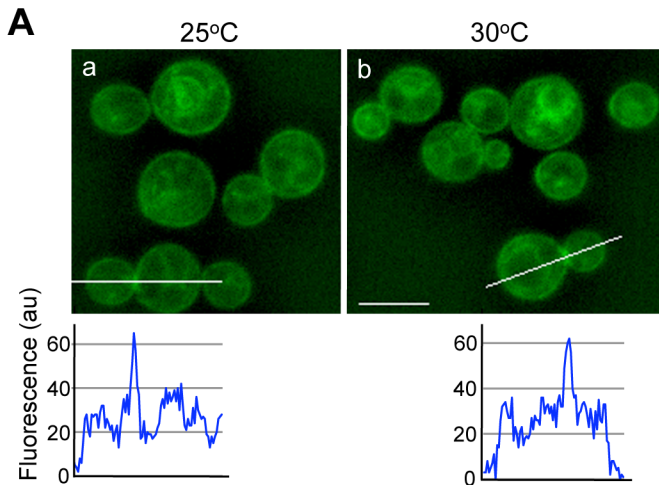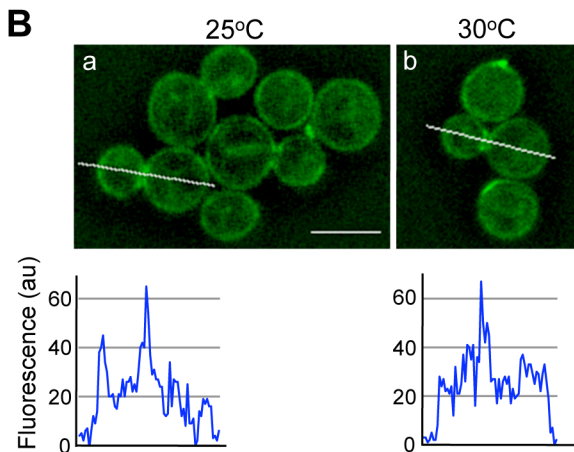

Supplemental Fig S3
